# Supplementary material for: Kinetics and mechanism of the [RuIII(edta)(H2O)]−-mediated oxidation of cysteine by H2O2
Source: Royal Society of Chemistry journal article supplement (doi:10.1039/c1dt10623f), 2011-01-01
Supplement: c1dt10623f.pdf [file c1dt10623f.pdf]

## Supporting Information

### Kinetics and mechanism of the $[\text{Ru}^{\text{III}}(\text{edta})(\text{H}_2\text{O})]^-$ -mediated oxidation of cysteine by $\text{H}_2\text{O}_2$

Debabrata Chatterjee,\* Erika Ember, Ujjwal Pal, Sarita Ghosh and Rudi van Eldik\*

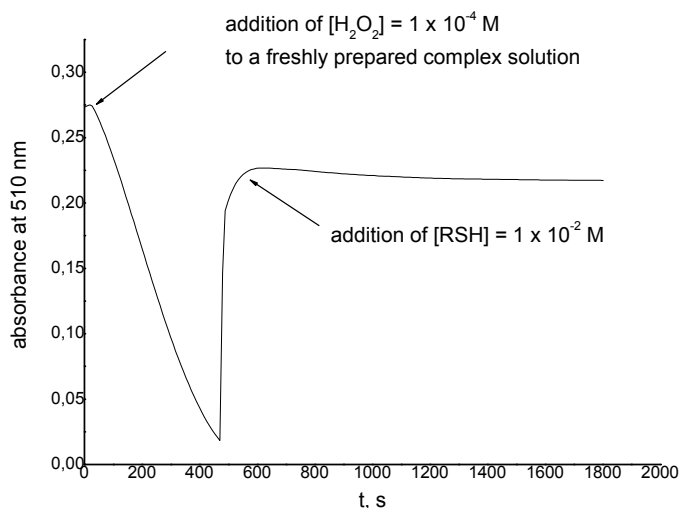

**Figure S1.** Reformation of  $[\text{Ru}^{\text{III}}(\text{edta})(\text{SR})]^{2-}$  on addition of an excess cysteine to the solution following the oxidation of  $[\text{Ru}^{\text{III}}(\text{edta})(\text{SR})]^{2-}$  by  $\text{H}_2\text{O}_2$ . Experimental conditions:  $[\mathbf{1}] = 1 \times 10^{-4} \text{ M}$ ,  $[\text{RSH}] = 1 \times 10^{-4} \text{ M}$ ,  $[\text{H}_2\text{O}_2] = 1 \times 10^{-4} \text{ M}$ , pH 5.1 (1 mM acetate buffer), temp. 20 °C.

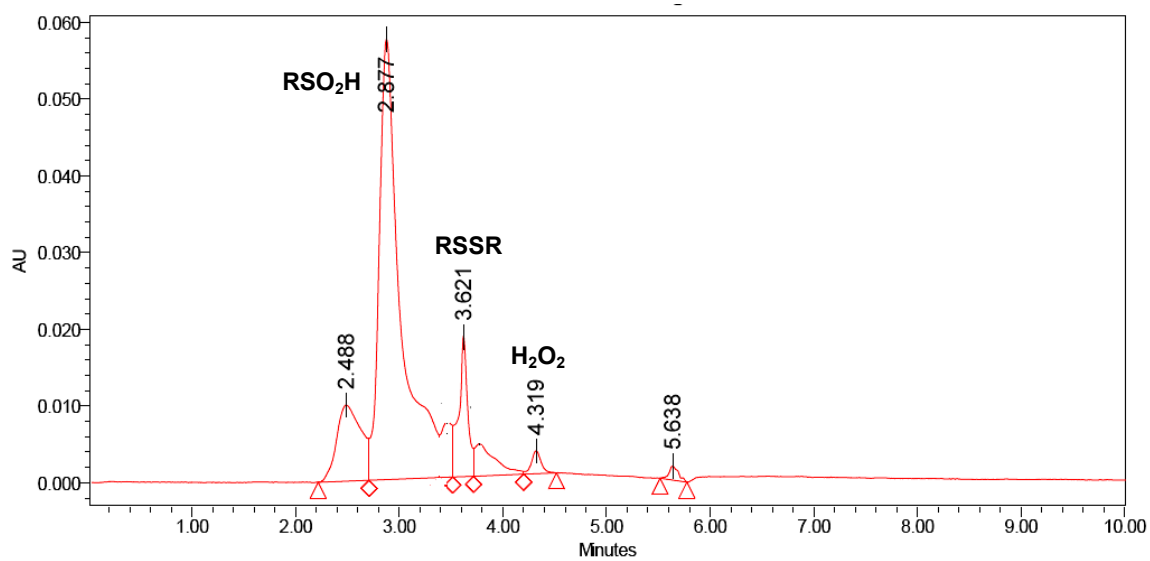

**Figure S2.** Results of HPLC product analysis for the oxidation of RSH by H<sub>2</sub>O<sub>2</sub> in the presence of [Ru<sup>III</sup>(edta)(H<sub>2</sub>O)]<sup>-</sup>. Experimental conditions: [1] = 1 x 10<sup>-4</sup> M, [RSH] = 1 x 10<sup>-4</sup> M and [H<sub>2</sub>O<sub>2</sub>] = 1 x 10<sup>-2</sup> M.

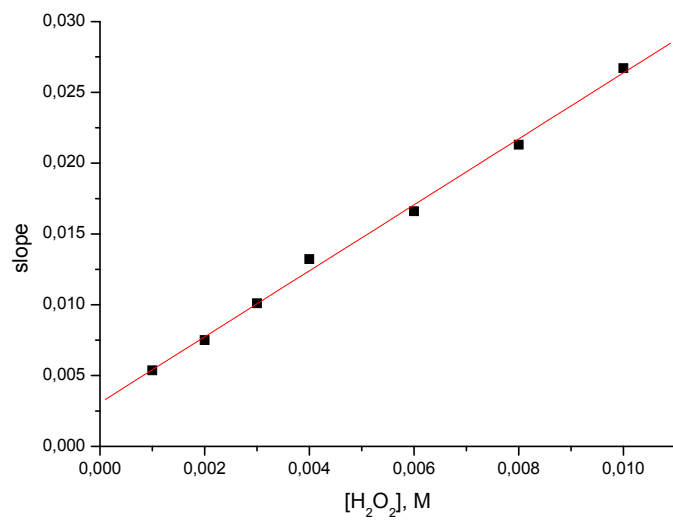

**Figure S3.** Maximum slope of the kinetic traces reported in Figure 3 as a function of H<sub>2</sub>O<sub>2</sub> concentration. Experimental conditions: see Figure 3.

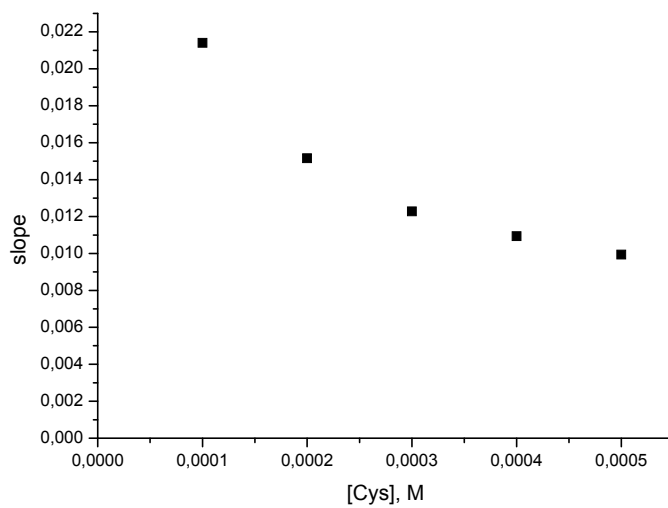

**Figure S4.** Maximum slope of the absorbance-time traces in Figure 5 as a function of [cysteine] for the reaction of  $[\text{Ru}^{\text{III}}(\text{edta})(\text{SR})]^{2-}$  with  $\text{H}_2\text{O}_2$ . Experimental conditions: see Figure 5.

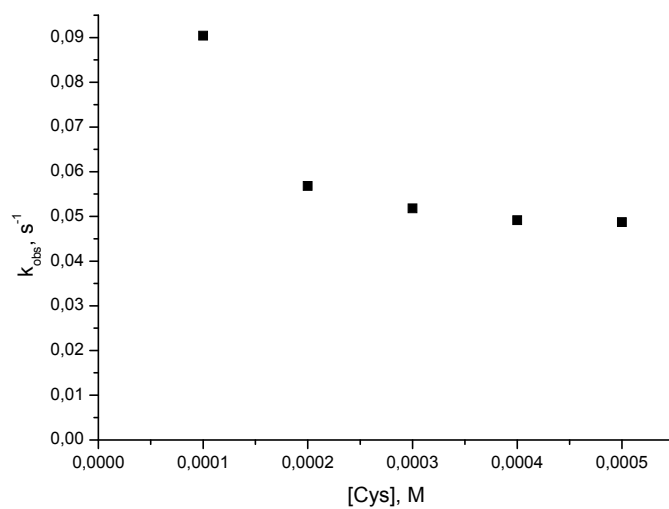

**Figure S5.**  $k_{\text{obs}}$  as a function of [cysteine] for the reaction of  $[\text{Ru}^{\text{III}}(\text{edta})(\text{SR})]^{2-}$  with  $\text{H}_2\text{O}_2$ .  
Experimental conditions: see Figure 5.
